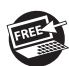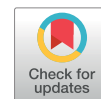

RESPONSE TO COMMENT ON CHO ET AL.

# Antidiabetic Medications and Mortality Risk in Individuals With Pancreatic Cancer–Related Diabetes and Postpancreatitis Diabetes: A Nationwide Cohort Study. *Diabetes Care* 2019;42:1675–1683

Jaelim Cho and Maxim S. Petrov

*Diabetes Care* 2019;42:e191–e192 | <https://doi.org/10.2337/dci19-0047>

We thank Devouge et al. (1) for their interest in our nationwide cohort study that will contribute meaningfully to the changing field of diabetes of the exocrine pancreas. The authors made a comment about the possibility of including individuals with undetected type 2 diabetes in the cohort of postpancreatitis diabetes mellitus (PPDM) we established (2). The issue of undetected type 2 diabetes is common and ubiquitous. This is because of suboptimal screening for diabetes in general and PPDM in particular. To ensure that this perennial issue does not cripple accuracy of data in the context of pancreatitis, the use of two terms (as appropriate) is advocated: “new-onset diabetes after pancreatitis” (NODAP) and PPDM (3,4). When an individual is confirmed not to have pre-existing diabetes based on HbA<sub>1c</sub> level at the first episode of pancreatitis, the term NODAP is used. The term PPDM is reserved for the occurrence of diabetes after the first episode of pancreatitis in individuals with no known evidence of prior diabetes, irrespective of baseline HbA<sub>1c</sub> level. Given that data on HbA<sub>1c</sub> were not available in our epidemiological study, we used the term PPDM. A prospective clinical longitudinal cohort study from our research group is in the pipeline to investigate the incidence and risk factors for NODAP, and that study includes baseline and regular follow-up HbA<sub>1c</sub> and fasting plasma glucose data.

The authors of the comment also speculated that the survival benefit of metformin might be limited to individuals with postacute pancreatitis diabetes mellitus (PPDM-A), and not those with postchronic pancreatitis diabetes mellitus (PPDM-C) because of possible excess adiposity of the former (resulting in higher effectiveness of metformin). Given that the 2019 MRI study of individuals after acute pancreatitis by our group showed the importance of visceral and ectopic fat (specifically, intrapancreatic fat deposition) in the pathogenesis of diabetes in this study population (5), we certainly agree that excess adiposity could act as an effect modifier of the association between the use of metformin and mortality in individuals following pancreatitis. Unfortunately, we did not have data related to adiposity in our nationwide epidemiological study. It is worth mentioning, though, that the proportion of metformin ever-users was 60.8% ( $n = 377$  of 620) and 56.0% ( $n = 121$  of 216) among individuals with PPDM-A and those with PPDM-C, respectively. The ever-use of metformin was associated with a 51% reduction in mortality risk in individuals with PPDM-A and a 37% reduction in those with PPDM-C. This difference was not statistically significant ( $P$  for interaction = 0.53).

In addition, Devouge et al. (1) interpreted the relatively low mean dose

of metformin (1,000 mg/day) in our study as poor tolerance in individuals with PPDM-C. It is important to clarify that the dose was based on the first prescription fill in new users of metformin, and the average first-prescribed dose of metformin was 1,000 mg/day in both individuals with PPDM-A and those with PPDM-C. The relatively low mean dose of metformin might have been related to the common practice of starting with a low dose of metformin and there might have been no need to increase the dose substantially during the study period because of the effectiveness of metformin in reducing blood glucose levels in PPDM-C.

**Funding.** This study was part of the Clinical and epidemiological investigations in Metabolism, nutrition, and pancreatic diseases (COSMOS) program. COSMOS is supported, in part, by the Royal Society of New Zealand (Rutherford Discovery Fellowship to M.S.P.).

**Duality of Interest.** No potential conflicts of interest relevant to this article were reported.

## References

1. Devouge A-C, Foussard N, Poupon P, et al. Comment on Cho et al. Antidiabetic medications and mortality risk in individuals with pancreatic cancer–related diabetes and postpancreatitis diabetes: a nationwide cohort study. *Diabetes Care* 2019;42:1675–1683 (Letter). *Diabetes Care* 2019;42:e189–e190. DOI: 10.2337/dci19-1504

School of Medicine, University of Auckland, Auckland, New Zealand

Corresponding author: Maxim S. Petrov, [max.petrov@gmail.com](mailto:max.petrov@gmail.com)

© 2019 by the American Diabetes Association. Readers may use this article as long as the work is properly cited, the use is educational and not for profit, and the work is not altered. More information is available at <http://www.diabetesjournals.org/content/license>.

2. Cho J, Scragg R, Pandol SJ, Goodarzi MO, Petrov MS. Antidiabetic medications and mortality risk in individuals with pancreatic cancer-related diabetes and postpancreatitis diabetes: A nationwide cohort study. *Diabetes Care* 2019; 42:1675–1683
3. Petrov MS, Yadav D. Global epidemiology and holistic prevention of pancreatitis. *Nat Rev Gastroenterol Hepatol* 2019;16:175–184
4. Petrov MS. Diabetes of the exocrine pancreas: American Diabetes Association-compliant lexicon. *Pancreatology* 2017;17:523–526
5. Singh RG, Cervantes A, Kim JU, et al. Intra-pancreatic fat deposition and visceral fat volume are associated with the presence of diabetes after acute pancreatitis. *Am J Physiol Gastrointest Liver Physiol* 2019;316:G806–G815
